# Supplementary material for: Distinct neural bases of disruptive behavior and autism symptom severity in boys with autism spectrum disorder
Source: PubMed Central journal article supplement (PMC5240249; doi:10.1186/s11689-017-9183-z), 2017-01-17
Supplement: 11689_2017_9183_MOESM2_ESM.pdf [file 11689_2017_9183_MOESM2_ESM.pdf]

Additional file 2

**Table: Peaks of regions of deactivation during biological motion versus during fixation (fixation>BIO) within the Default Mode Network (DMN) in TD and ASD, respectively**

| Anatomical regions                       |   | TD       |          |          |          | ASD      |          |          |          |
|------------------------------------------|---|----------|----------|----------|----------|----------|----------|----------|----------|
|                                          |   | <i>x</i> | <i>y</i> | <i>z</i> | <i>Z</i> | <i>x</i> | <i>y</i> | <i>z</i> | <i>Z</i> |
| Angular gyrus                            | L | -42      | -70      | 42       | 3.84     | -40      | -68      | 46       | 5.81     |
|                                          | R | 58       | -52      | 30       | 4.14     | 48       | -60      | 48       | 5.52     |
| Calcarine fissure and surrounding cortex | L | 0        | -68      | 20       | 3.08     | -12      | -62      | 10       | 6.09     |
|                                          | R | 6        | -60      | 18       | 2.65     | 6        | -62      | 16       | 6.61     |
| Anterior cingulate & paracingulate gyri  | L | 2        | 40       | 18       | 3.34     | 2        | 46       | 6        | 4.32     |
|                                          | R | 2        | 38       | 18       | 3.53     | 2        | 44       | 6        | 4.56     |
| Middle cingulate & paracingulate gyri    | L | 0        | -44      | 46       | 4.04     | 0        | -44      | 46       | 5.32     |
|                                          | R | 2        | -44      | 36       | 3.96     | 2        | -44      | 36       | 4.76     |
| Posterior cingulate gyrus                | L | 0        | -40      | 32       | 2.63     | 0        | -34      | 28       | 4.57     |
|                                          | R | 8        | -40      | 28       | 3.26     | 8        | -42      | 22       | 4.66     |
| Cuneus                                   | L | 2        | -68      | 26       | 4.02     | 0        | -74      | 30       | 6.68     |
|                                          | R | 6        | -70      | 26       | 4.41     | 6        | -70      | 26       | 5.70     |
| Superior frontal gyrus, medial orbital   | L |          |          |          |          | -14      | 64       | -2       | 3.02     |
|                                          | R | 6        | 44       | -6       | 2.67     | 4        | 46       | -2       | 4.10     |
| Middle frontal gyrus                     | L |          |          |          |          | -48      | 18       | 42       | 4.38     |
|                                          | R | 26       | 36       | 36       | 3.54     | 32       | 30       | 50       | 4.23     |
| Superior frontal gyrus, dorsolateral     | L |          |          |          |          | -30      | 58       | 0        | 4.44     |
|                                          | R | 24       | 44       | 38       | 4.66     | 28       | 32       | 50       | 4.19     |

|                                |   |     |     |     |      |     |     |     |      |
|--------------------------------|---|-----|-----|-----|------|-----|-----|-----|------|
| Superior frontal gyrus, medial | L | 2   | 44  | 22  | 2.99 | 0   | 30  | 32  | 4.22 |
|                                | R | 6   | 56  | 6   | 2.69 | 4   | 48  | 2   | 4.73 |
| Lingual gyrus                  | L |     |     |     |      | -12 | -54 | 2   | 5.30 |
|                                | R | 8   | -42 | 4   | 2.98 | 12  | -56 | 8   | 5.85 |
| Lateral orbital gyrus          | L |     |     |     |      | -42 | 48  | -16 | 2.75 |
| Middle occipital gyrus         | L | -38 | -80 | 38  | 3.34 | -36 | -70 | 40  | 4.43 |
|                                | R |     |     |     |      | 44  | -72 | 32  | 3.25 |
| Superior occipital gyrus       | L | -14 | -68 | 28  | 2.99 | -14 | -68 | 28  | 4.97 |
| Inferior parietal gyrus        | L | -44 | -60 | 50  | 3.56 | -36 | -72 | 46  | 5.24 |
|                                | R | 58  | -52 | 40  | 4.25 | 46  | -58 | 44  | 4.58 |
| Superior parietal gyrus        | L | -38 | -66 | 52  | 3.15 | -36 | -70 | 52  | 4.15 |
| Precentral gyrus               | L |     |     |     |      | -44 | 10  | 50  | 3.14 |
| Precuneus                      | L | 2   | -74 | 38  | 4.21 | -2  | -70 | 42  | 6.74 |
|                                | R | 8   | -72 | 36  | 4.88 | 4   | -74 | 38  | 5.88 |
| Supplementary motor area       | L |     |     |     |      | 0   | 12  | 60  | 3.27 |
| Supramarginal gyrus            | L | -58 | -56 | 30  | 2.61 | -60 | -54 | 30  | 2.86 |
|                                | R | 52  | -44 | 42  | 3.76 | 52  | -44 | 44  | 3.33 |
| Inferior temporal gyrus        | L |     |     |     |      | -60 | -26 | -18 | 3.07 |
|                                | R | 66  | -14 | -26 | 3.03 | 64  | -26 | -18 | 3.01 |
| Middle temporal gyrus          | L |     |     |     |      | -64 | -22 | -14 | 3.47 |
|                                | R | 70  | -14 | -16 | 3.34 | 64  | -10 | -12 | 4.08 |
| Superior temporal gyrus        | R | 68  | -28 | 0   | 3.00 | 64  | -12 | -10 | 3.42 |

---

*Note.* Coordinates are in MNI152 mm space. Results were thresholded at  $Z > 1.96$  ( $p < .05$ ) and corrected for multiple comparisons at the cluster level ( $p < .05$ ). L, Left; R, Right.
