# Supplementary material for: Distinct neural bases of disruptive behavior and autism symptom severity in boys with autism spectrum disorder
Source: PubMed Central journal article supplement (PMC5240249; doi:10.1186/s11689-017-9183-z), 2017-01-17

## Additional file 5

Group main effects of the contrast of fixation>SCR within DMN

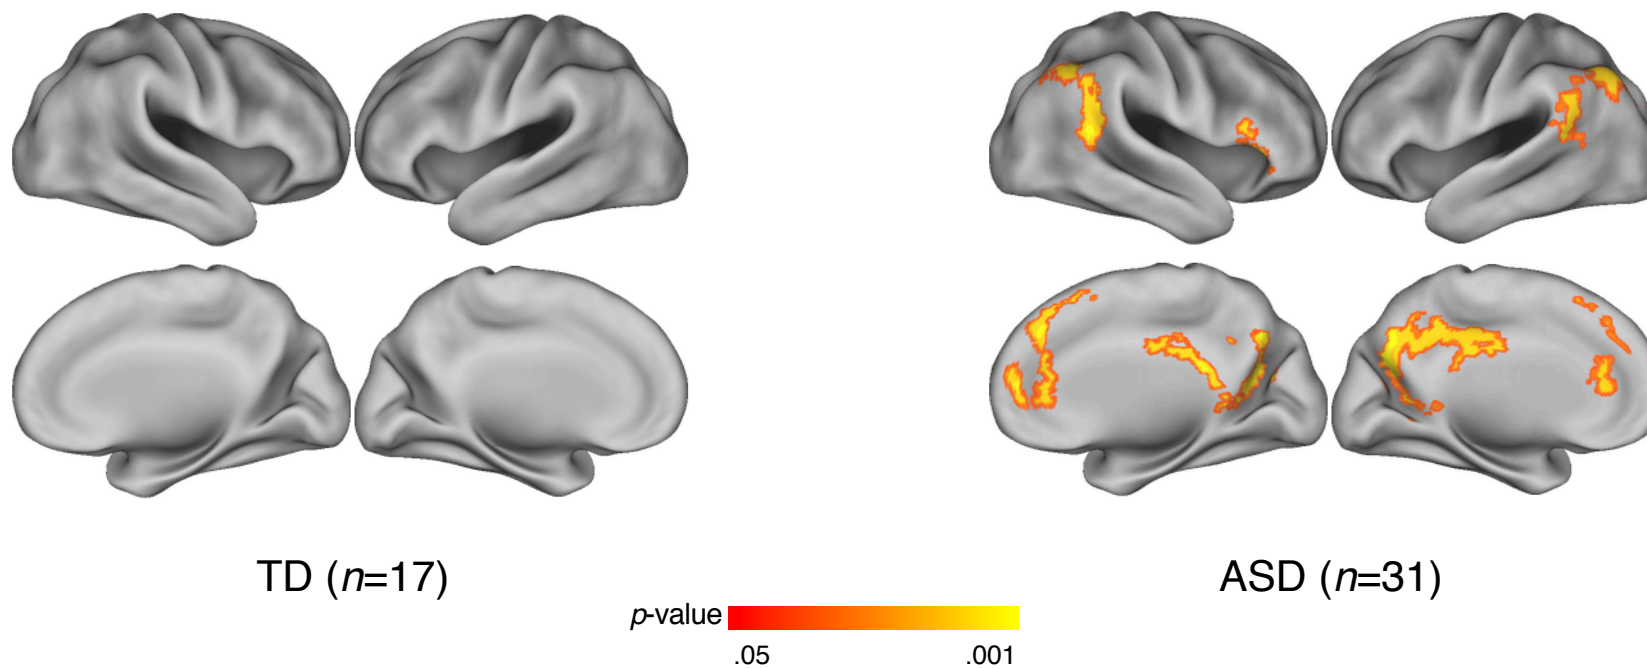

Group main effects of the contrast of SCR>BIO within DMN

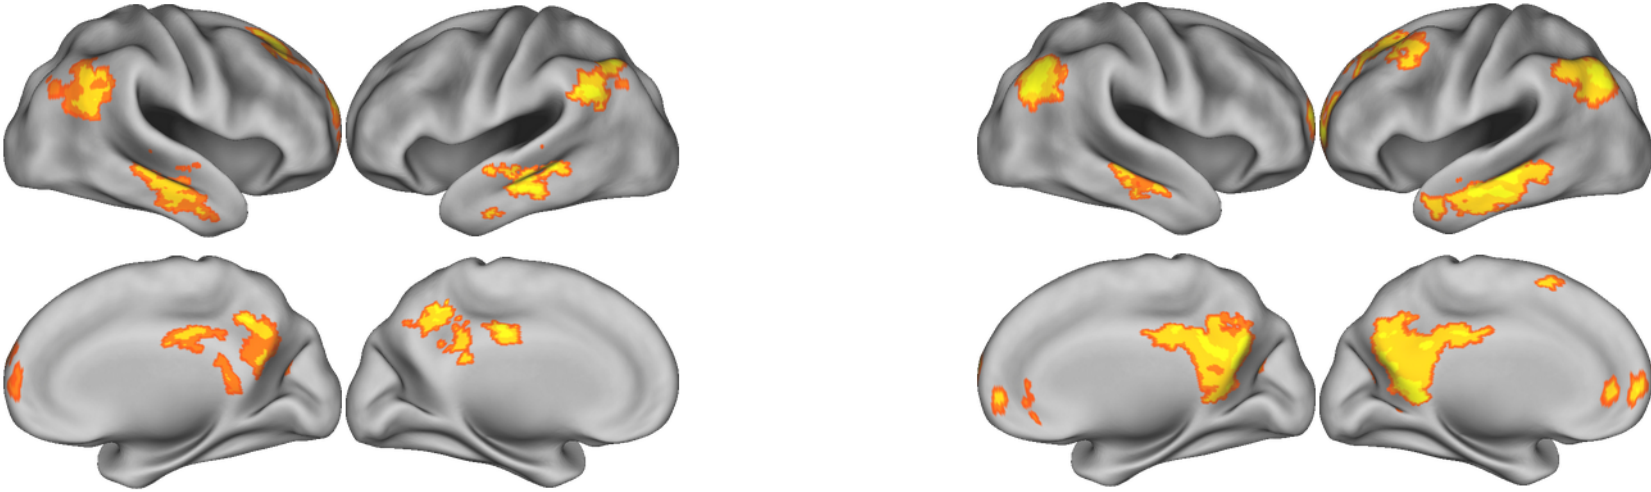

TD ( $n=17$ )

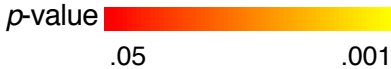

ASD ( $n=31$ )

# Neural correlates of disruptive behavior on the contrast of SCR>BIO within DMN in ASD

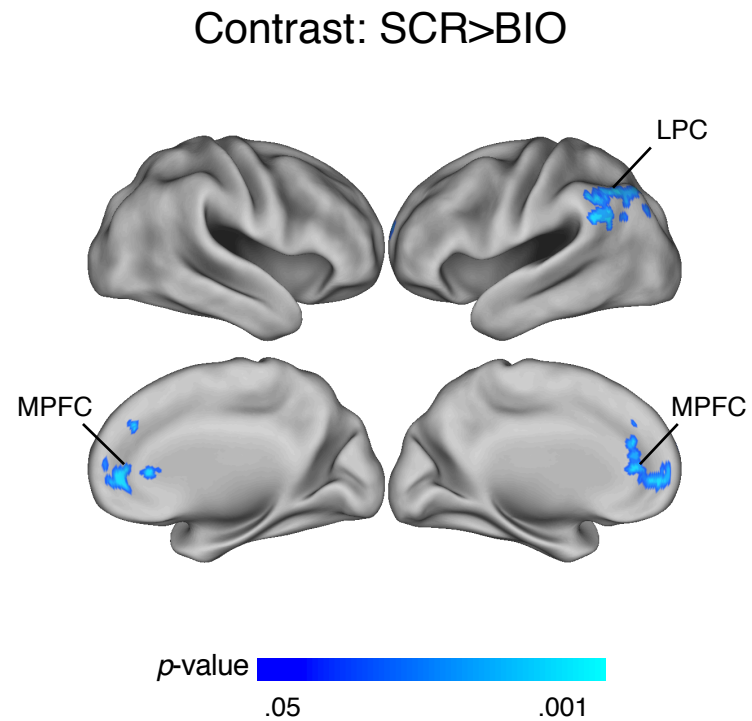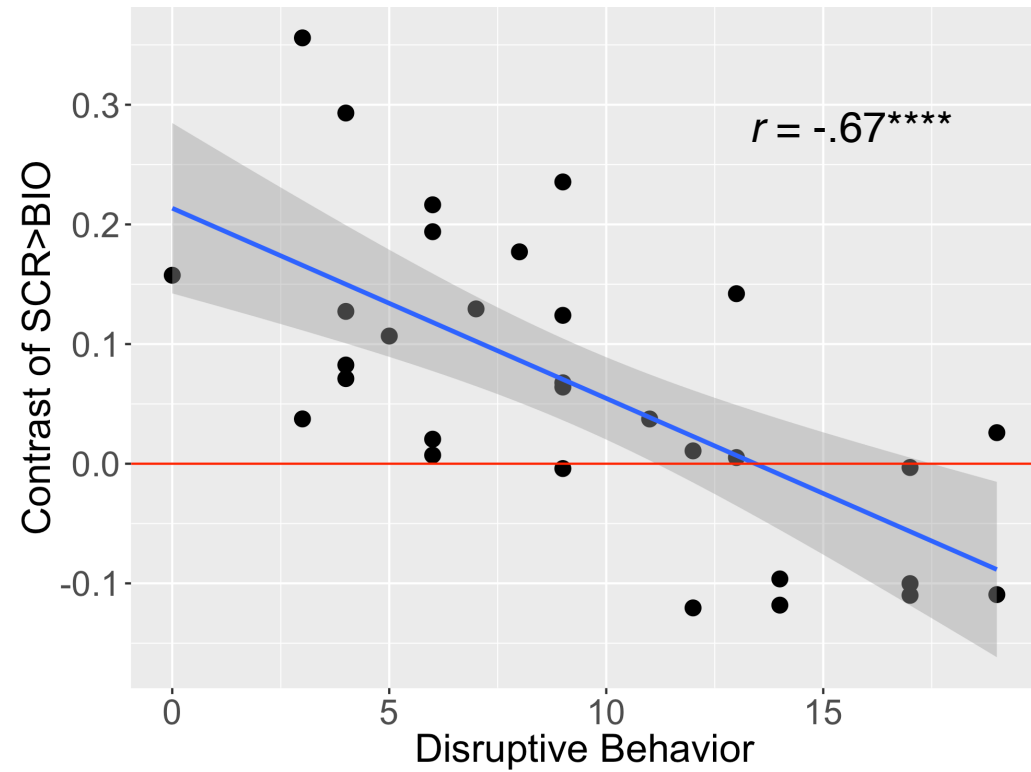

Supplement: 11689_2017_9183_MOESM5_ESM.pdf [file 11689_2017_9183_MOESM5_ESM.pdf]
